# Supplementary material for: Performance of a mobile car platform for mean wind and turbulence measurements
Source: Copernicus journal article supplement (doi:10.5194/amt-7-1825-2014), 2014-06-25
Supplement: Supplementary file 1 [file amt-7-1825-2014-supplement.pdf]

Supplement of Atmos. Meas. Tech., 7, 1825–1837, 2014  
<http://www.atmos-meas-tech.net/7/1825/2014/>  
doi:10.5194/amt-7-1825-2014-supplement  
© Author(s) 2014. CC Attribution 3.0 License.

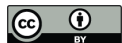

*Supplement of*

## **Performance of a mobile car platform for mean wind and turbulence measurements**

**D. Belušić et al.**

*Correspondence to:* D. Belušić ([danijel.belusic@monash.edu](mailto:danijel.belusic@monash.edu))

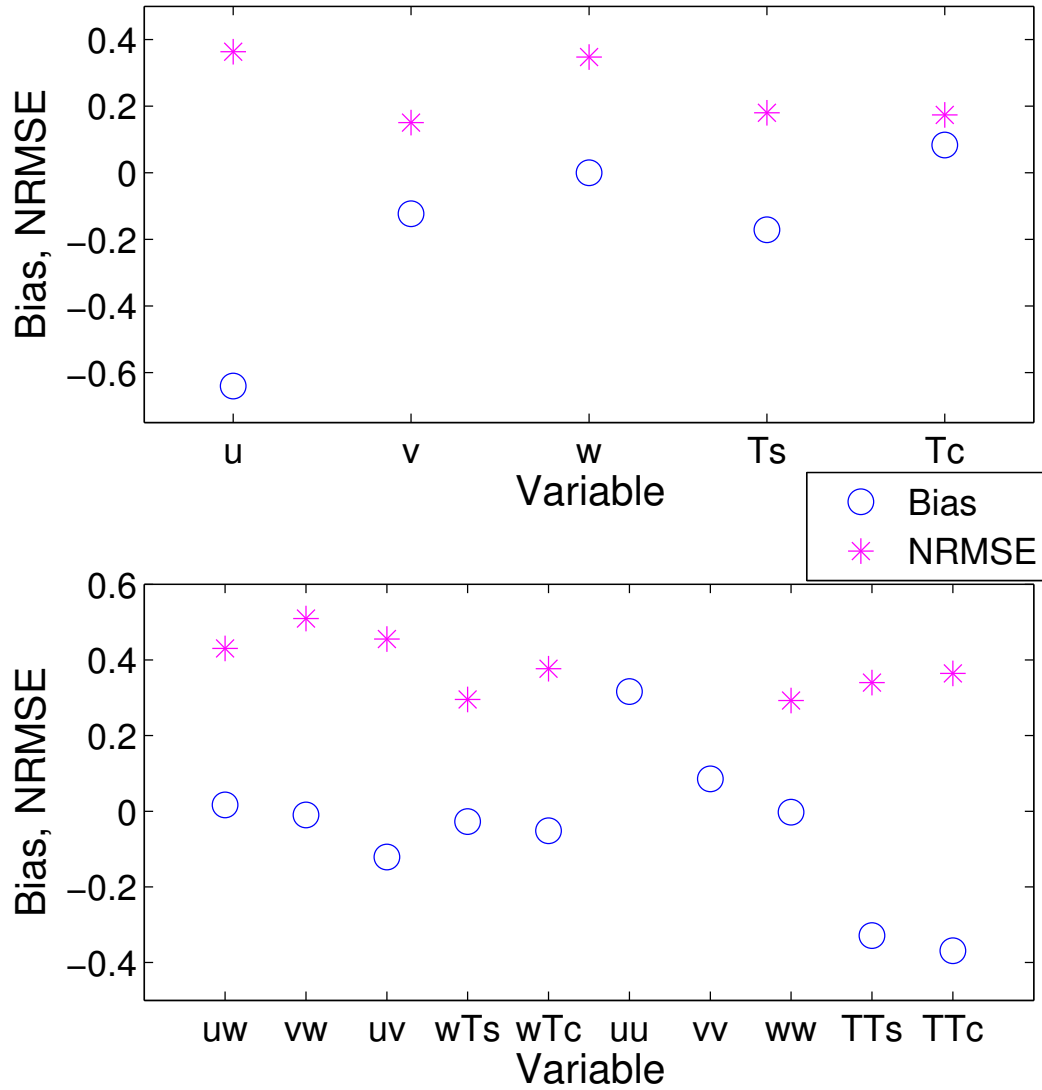

Figure 1: Bias and normalized root mean squared error (RMSE) for mean (top panel) and turbulence (bottom panel) variables. The RMSE is normalized by  $x_{max} - x_{min}$ , where  $x$  represents the variables shown in the figure. Ts and Tc stand for the sonic and thermocouple temperature, respectively.

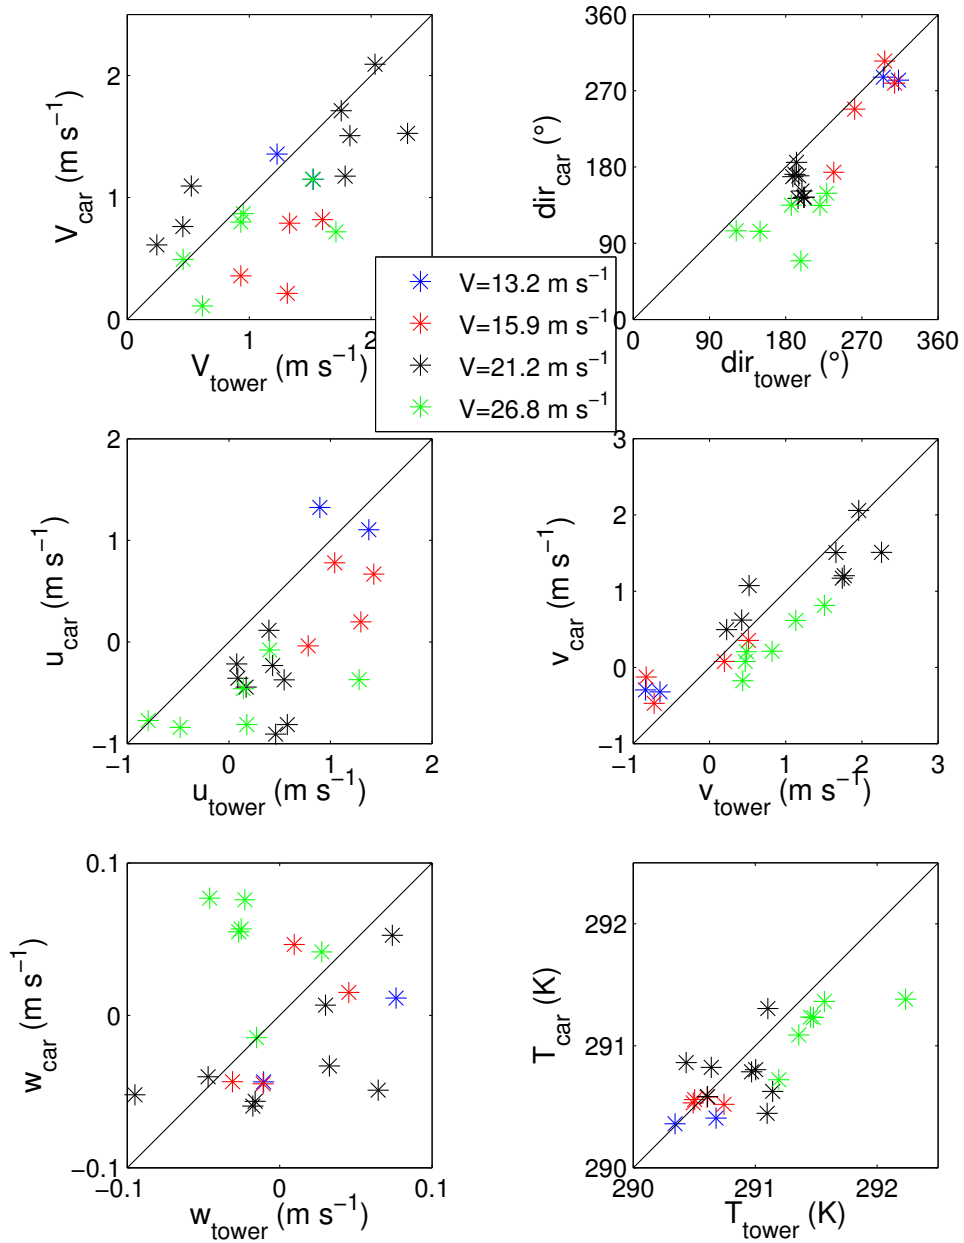

Figure 2: Scatter plot of tower vs. car mean variables: vector-averaged wind speed ( $V$ ), wind direction ( $\text{dir}$ ), eastward ( $u$ ), northward ( $v$ ) and vertical ( $w$ ) wind components, and sonic temperature ( $T$ ).

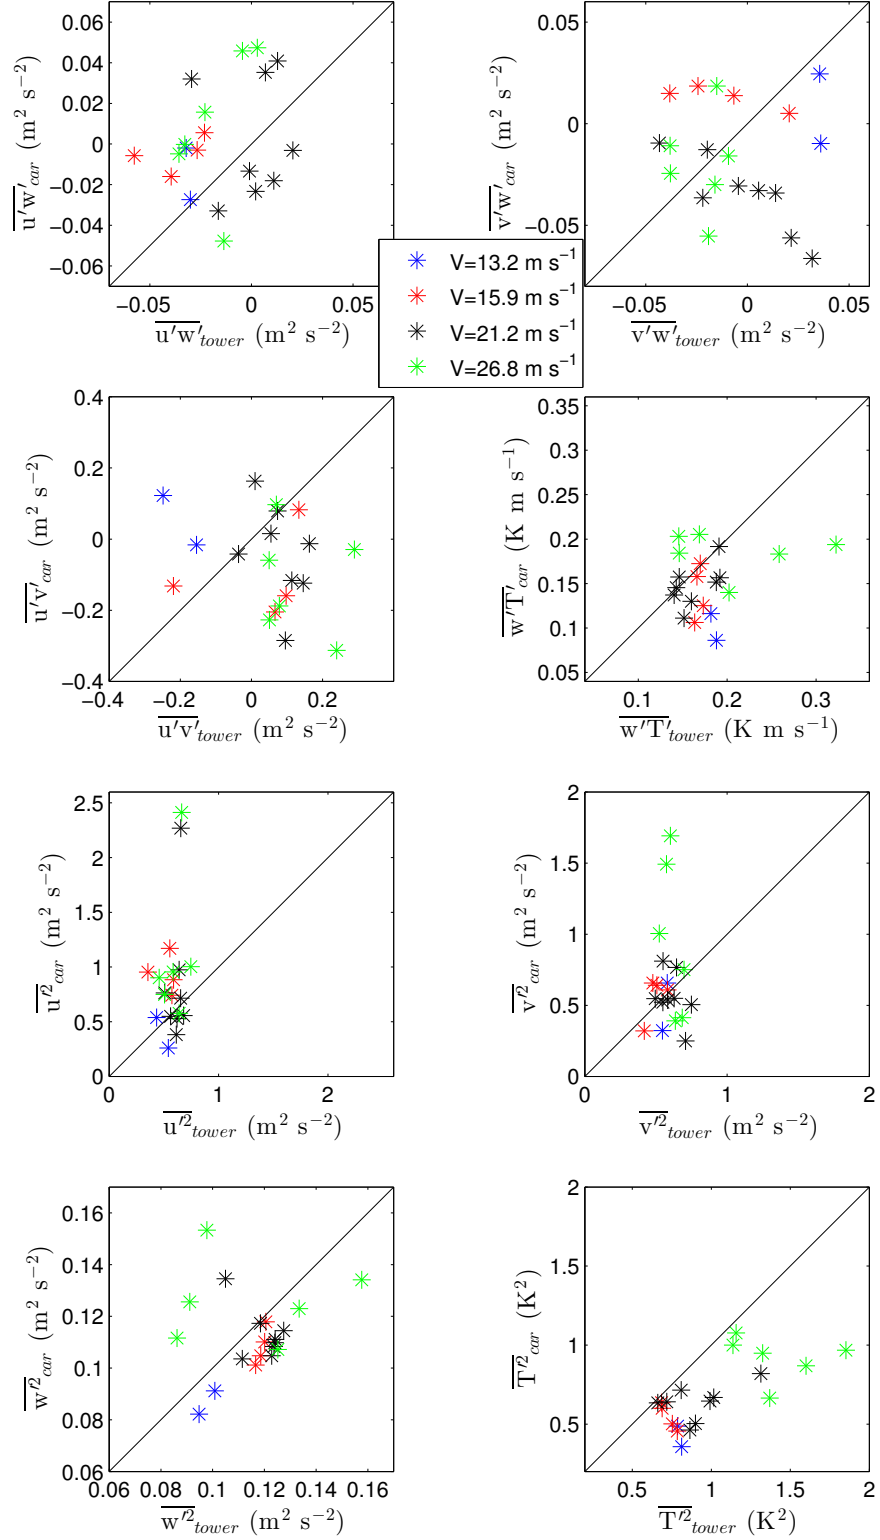

Figure 3: Scatter plot of tower vs. car fluxes and variances. Averaging interval for the tower data is 10 min. The sonic temperature is used for calculating fluxes and variances.

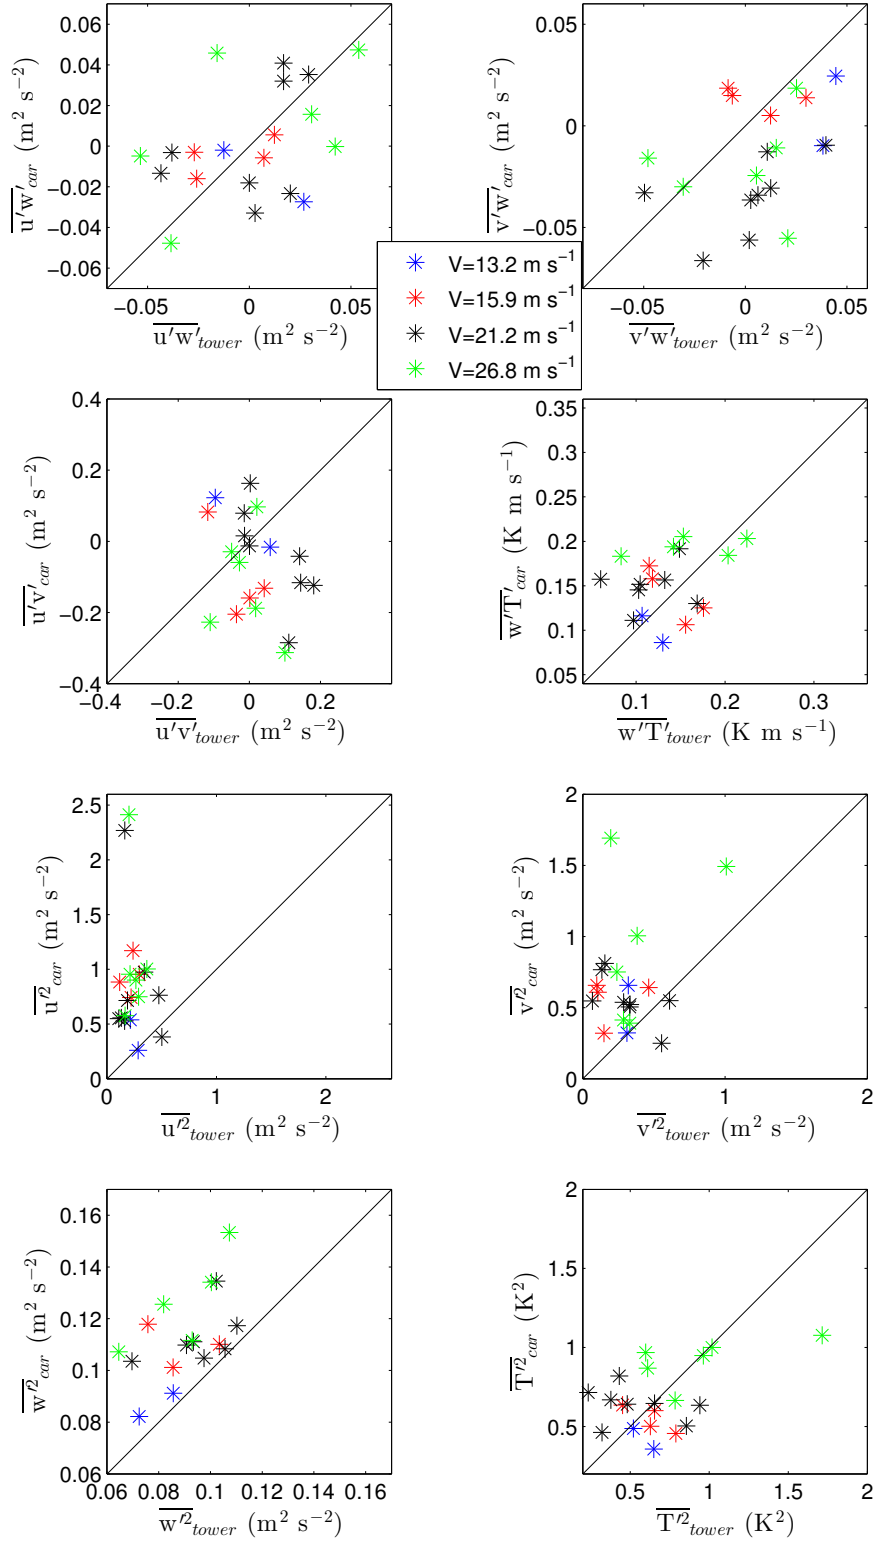

Figure 4: As in Fig. 3, except that the averaging interval for the tower data is 2 min.

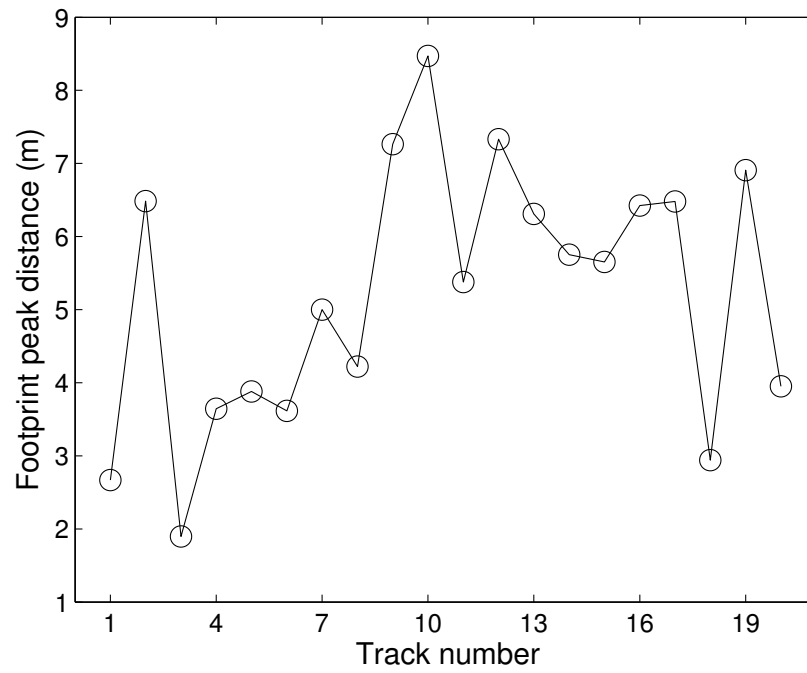

Figure 5: Distance of the footprint peak for each car track. The footprint is calculated according to Hsieh et al. (2000).

## References

Hsieh, C.-I., Katul, G., and Chi, T.-W.: An approximate analytical model for footprint estimation of scalar fluxes in thermally stratified atmospheric flows, *Advances in Water Resources*, 23, 765 – 772, doi:10.1016/S0309-1708(99)00042-1, 2000.
